# Supplementary material
Source: Springer Nature journal article supplement (https://www.springermedizin.de/resource/supplementary/12889_2011_3763_MOESM3_ESM.pdf/9489740)

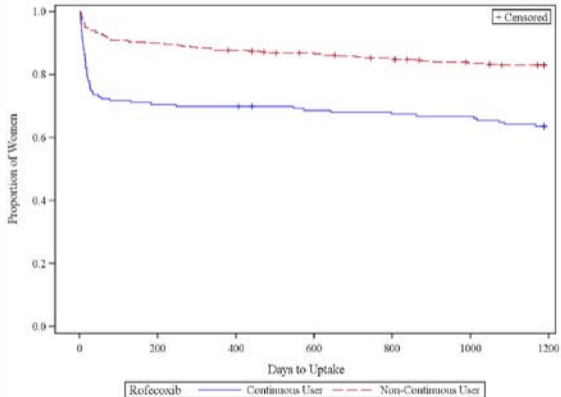

**(Log-rank Test:  $<0.0001$ )**

Supplement: MOESM3 [file 9489740]
